# Supplementary material for: Complexation of heavy metal cations with imidazolium ionic liquids lowers their reduction energy: implications for electrochemical separations
Source: Royal Society of Chemistry journal article supplement (doi:10.1039/d3gc03713d), 2023-12-22
Supplement: d3gc03713d1.pdf [file d3gc03713d1.pdf]

## Supplementary Information

# Complexation of heavy metal cations with imidazolium ionic liquids lowers their reduction energy: implications for electrochemical separations

*Shuai Tan,<sup>a</sup> Difan Zhang,<sup>a</sup> Ying Chen,<sup>a</sup> Benjamin A. Helfrecht,<sup>a</sup> Eric T. Baxter,<sup>a</sup> Wenjin Cao,<sup>a</sup> Xue-  
Bin Wang,<sup>a</sup> Manh-Thuong Nguyen,<sup>a\*</sup> Grant E. Johnson,<sup>a\*</sup> and Venkateshkumar Prabhakaran<sup>a\*</sup>*

<sup>1</sup>Physical and Computational Sciences Directorate, Pacific Northwest National Laboratory,  
Richland, Washington 99354, United States

[\\*venky@pnnl.gov](mailto:*venky@pnnl.gov)

[\\*grant.johnson@pnnl.gov](mailto:*grant.johnson@pnnl.gov)

[\\*manhthuong.nguyen@pnnl.gov](mailto:*manhthuong.nguyen@pnnl.gov)

### ***Operando Raman Spectroscopy***

An aqueous solution of 1 M EMIMCl + 10 mM PbCl<sub>2</sub> was filled into a glass NMR tube (5 mm diameter, Wilmad® NMR tubes, Sigma Aldrich), sealed, and mounted on an aluminum sample holder with a built-in temperature control system. Raman spectroscopy measurements were performed using an in-house spectrometer equipped with a 633 nm excitation laser and a charge-coupled device (CCD) detection system (Andor, Shamrock 303i and iDus 416). The objective lens of the Raman microscope was placed at the curved edge of the NMR tube and a laser beam with an intensity of 2 – 3 mW was focused on the sample. The presented Raman data is spatially (10 spectra in an area of 1 x 1 mm<sup>2</sup>) and temporally (integration time of 360 sec/spectra) averaged to ensure sample integrity throughout the measurements. Raman spectra were collected as a function of temperature after the set temperature was reached for 1 hour. The resolution of Raman spectra is 2 cm<sup>-1</sup>

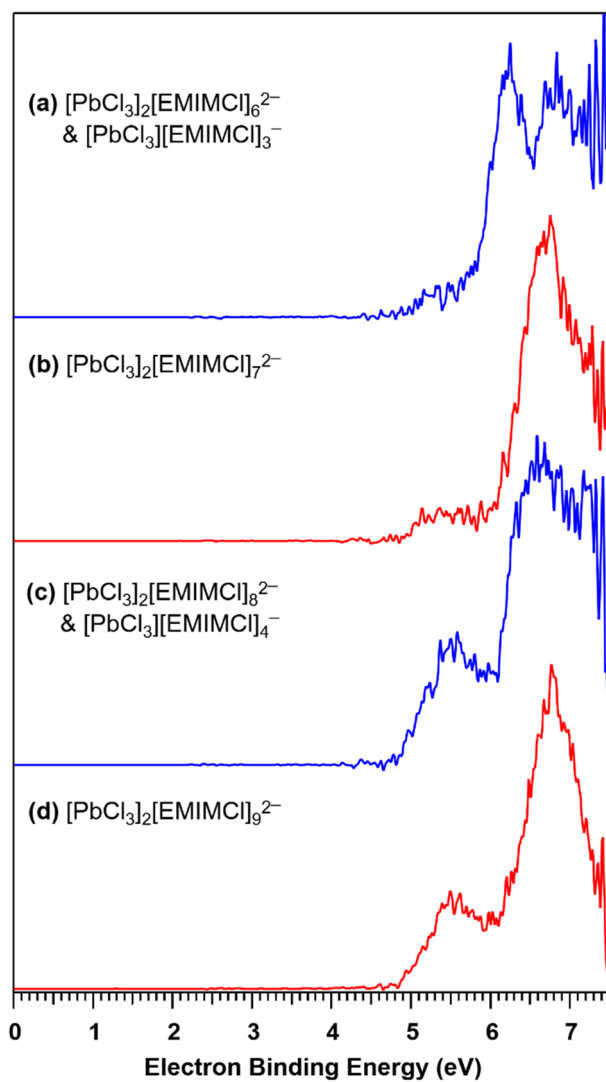

**Figure S1.** NIPES spectra of gas-phase doubly charged  $[\text{PbCl}_3]_2[\text{EMIMCl}]_6^{2-}/[\text{PbCl}_3][\text{EMIMCl}]_3^-$  (a),  $[\text{PbCl}_3]_2[\text{EMIMCl}]_7^{2-}$  (b),  $[\text{PbCl}_3]_2[\text{EMIMCl}]_8^{2-}/[\text{PbCl}_3][\text{EMIMCl}]_4^-$  (c), and  $[\text{PbCl}_3]_2[\text{EMIMCl}]_9^{2-}$  (d) complexes. Note the  $m/z$  degenerate singly and doubly charged species.

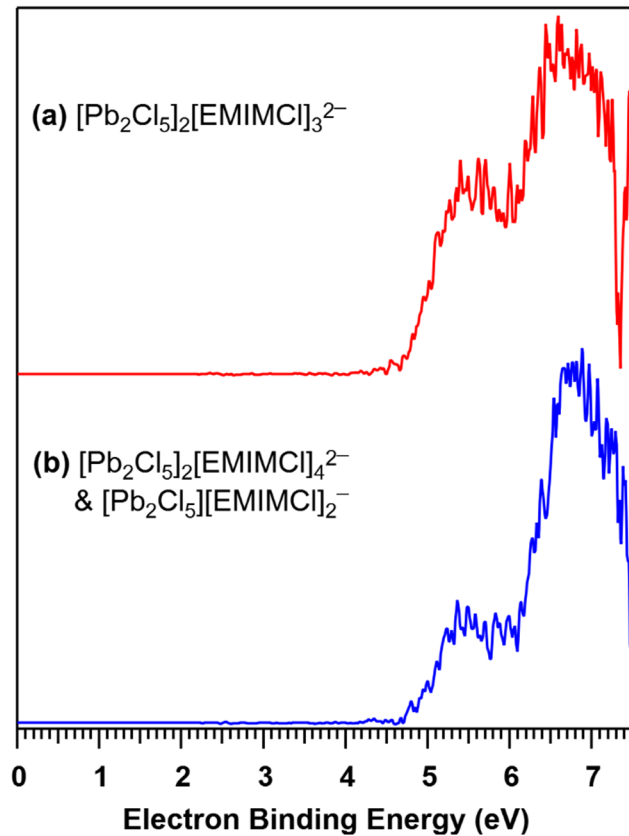

**Figure S2.** NIPES spectra of gas-phase doubly charged  $[\text{Pb}_2\text{Cl}_5]_2[\text{EMIMCl}]_3^{2-}$  (a) and  $[\text{Pb}_2\text{Cl}_5]_2[\text{EMIMCl}]_4^{2-}/[\text{Pb}_2\text{Cl}_5][\text{EMIMCl}]_2^-$  (b) complexes. Note the  $m/z$  degenerate singly and doubly charged species.

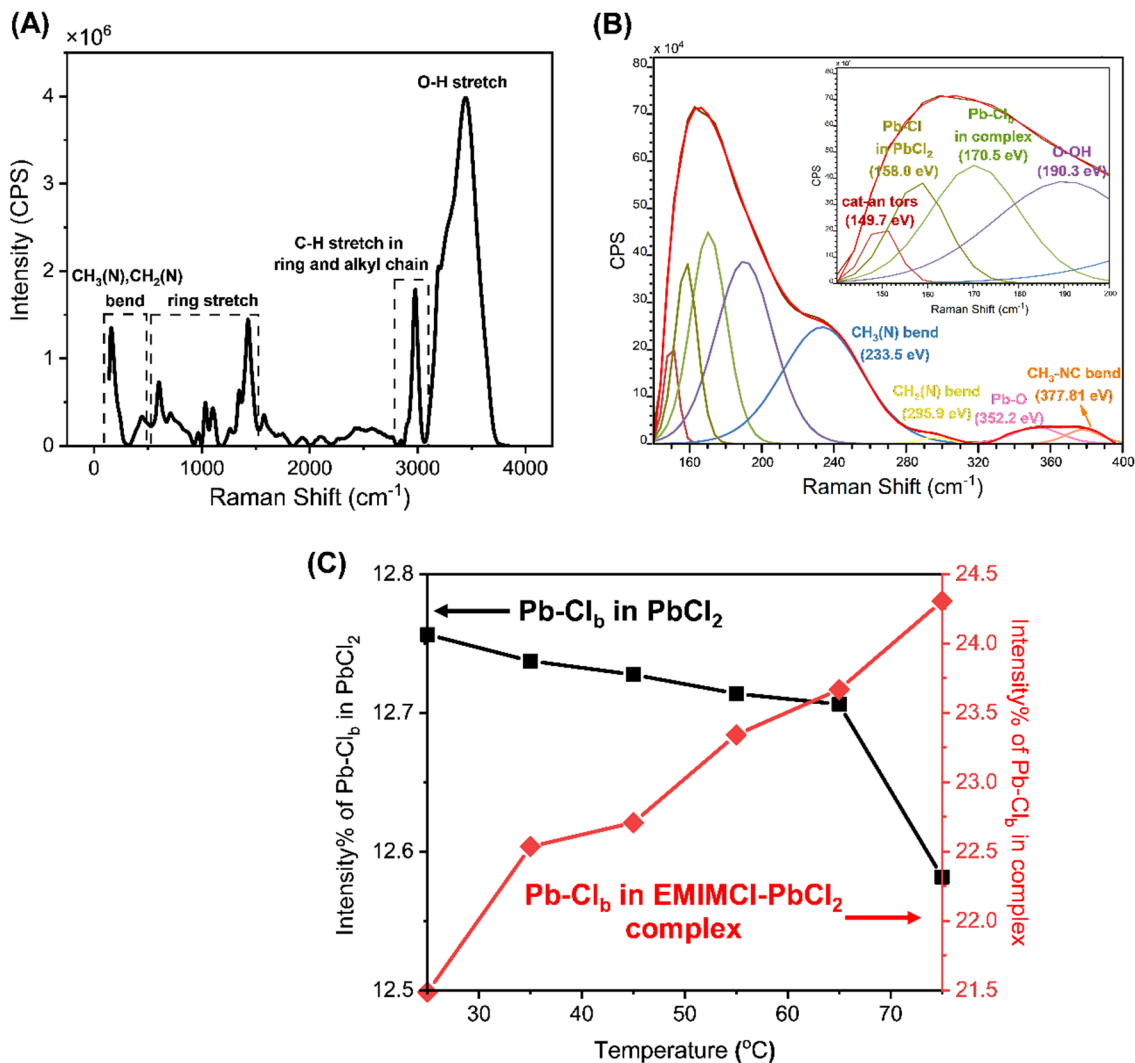

**Figure S3.** (A) Raman spectra in the range of 140 – 4000  $\text{cm}^{-1}$  and (B) 140 – 400  $\text{cm}^{-1}$  with deconvoluted fitting for the 1 M EMIMCl + 10 mM  $\text{PbCl}_2$  aqueous solution. The inset of (B) is the spectrum between 140 – 200  $\text{cm}^{-1}$ . (C) Change in the percent intensity of the  $\text{Pb-Cl}$  peak in  $\text{PbCl}_2$  and  $\text{Pb-Cl}_b$  in the EMIMCl- $\text{PbCl}_2$  complex as a function of temperature.

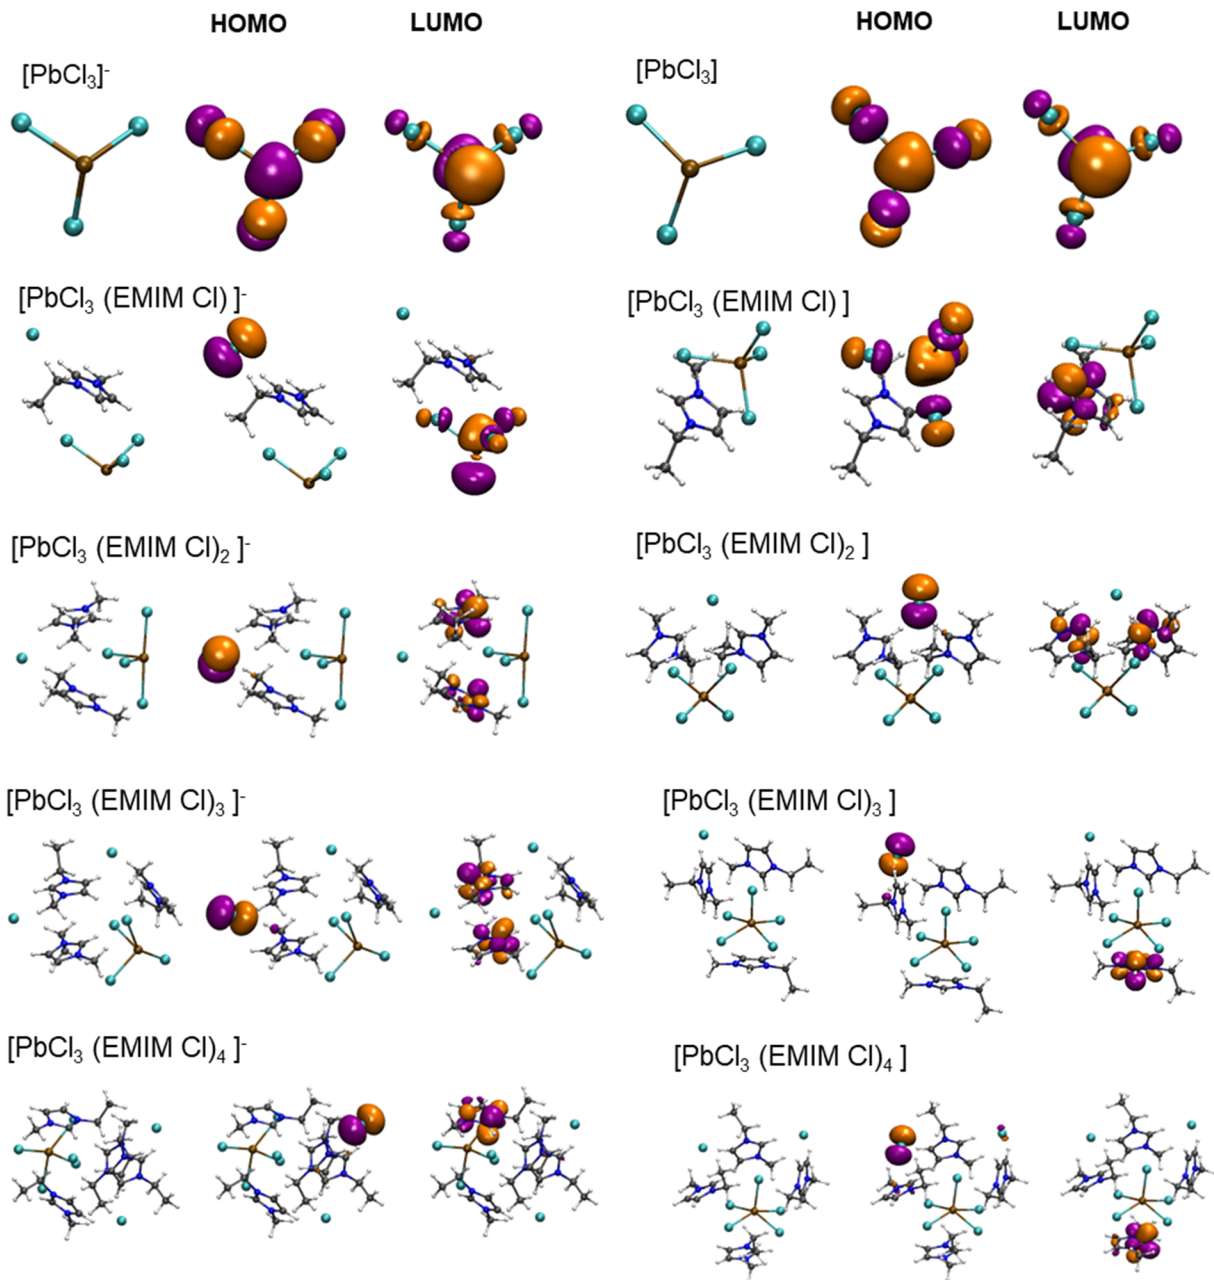

**Figure S4.** Visualization of the calculated HOMO and LUMO for gas phase  $\text{PbCl}_3^-$  clusters with EMIMCl.

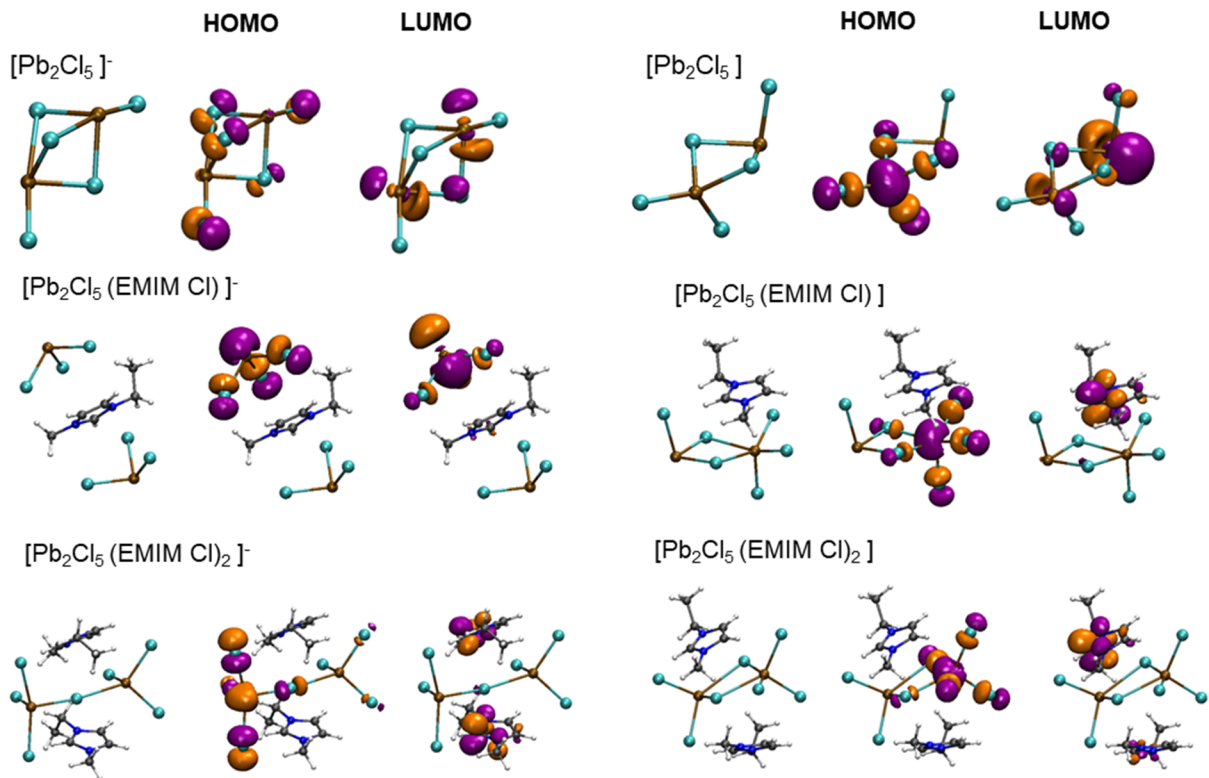

**Figure S5.** Visualization of the calculated HOMO and LUMO for gas phase  $\text{Pb}_2\text{Cl}_5^-$  clusters with EMIMCl.

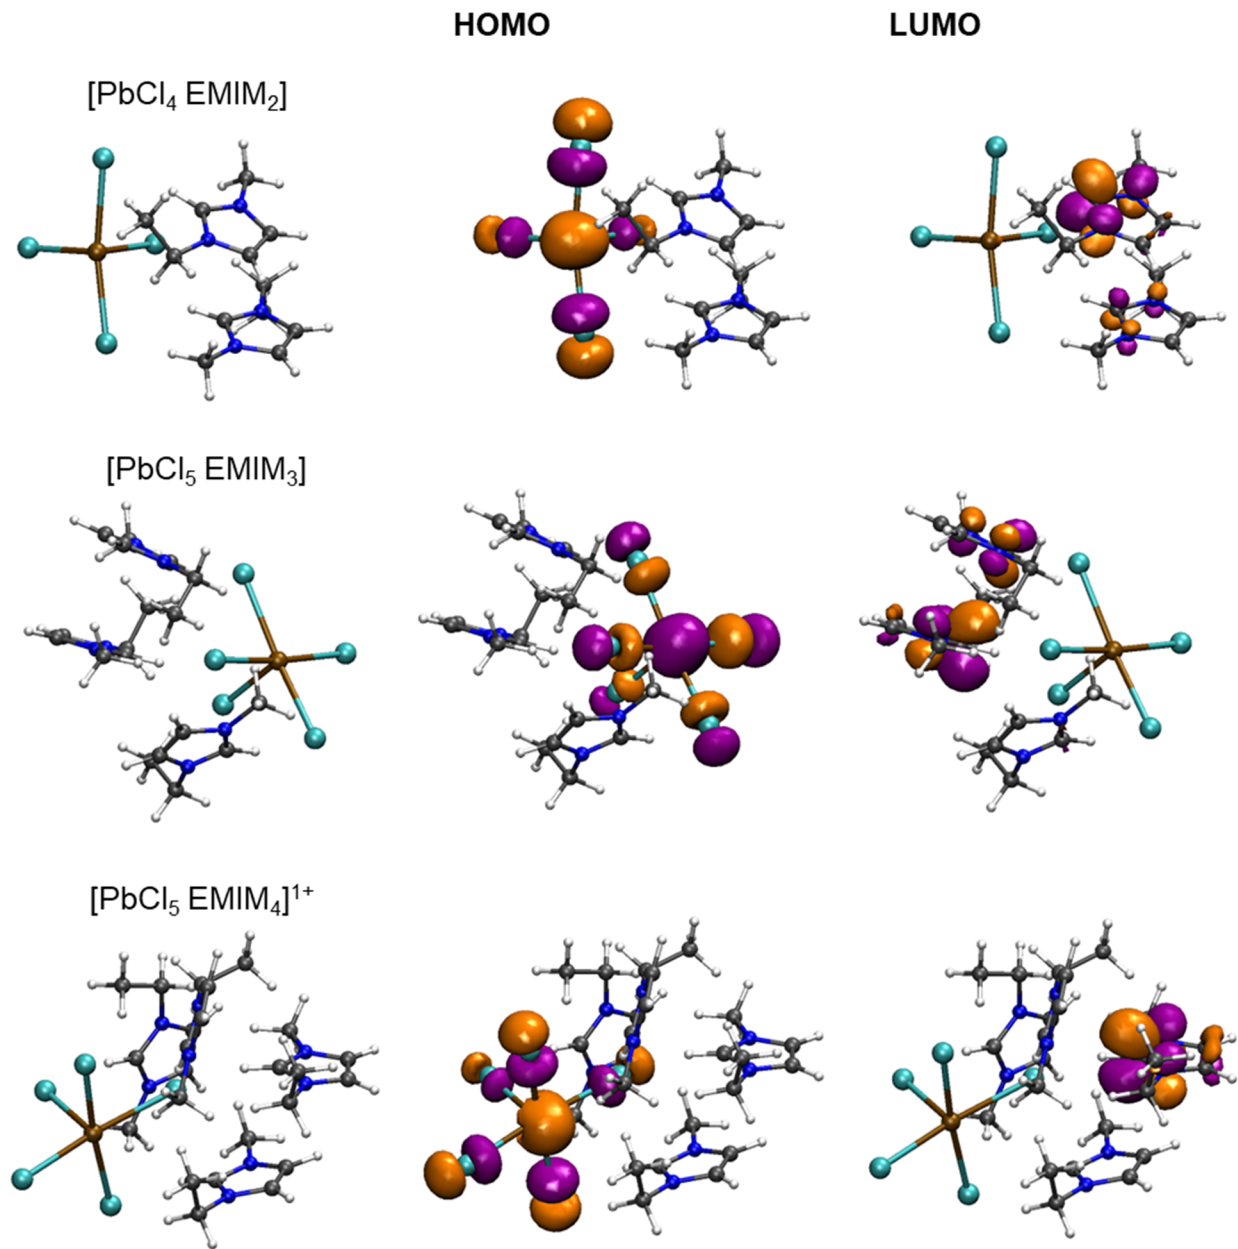

**Figure S6.** Visualization of the calculated HOMO and LUMO for aqueous phase Pb-Cl clusters with EMIM<sup>+</sup> cations identified by experimental NMR shifts.



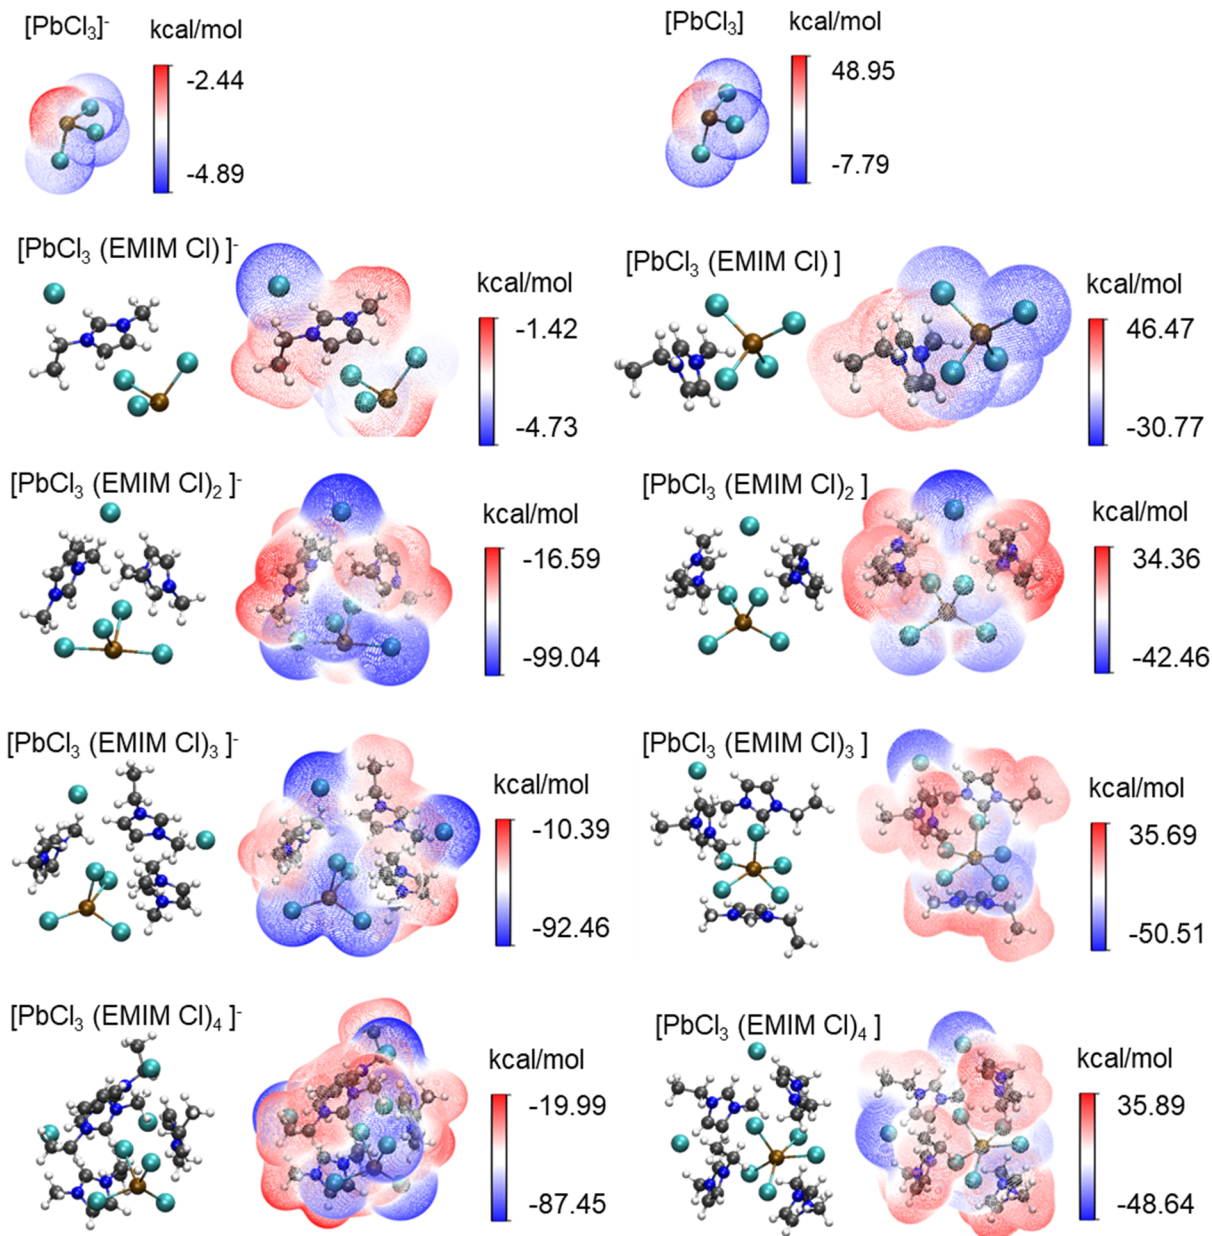

**Figure S7.** Visualization of the calculated ESP for gas phase  $\text{PbCl}_3^-$  clusters with EMIMCl.

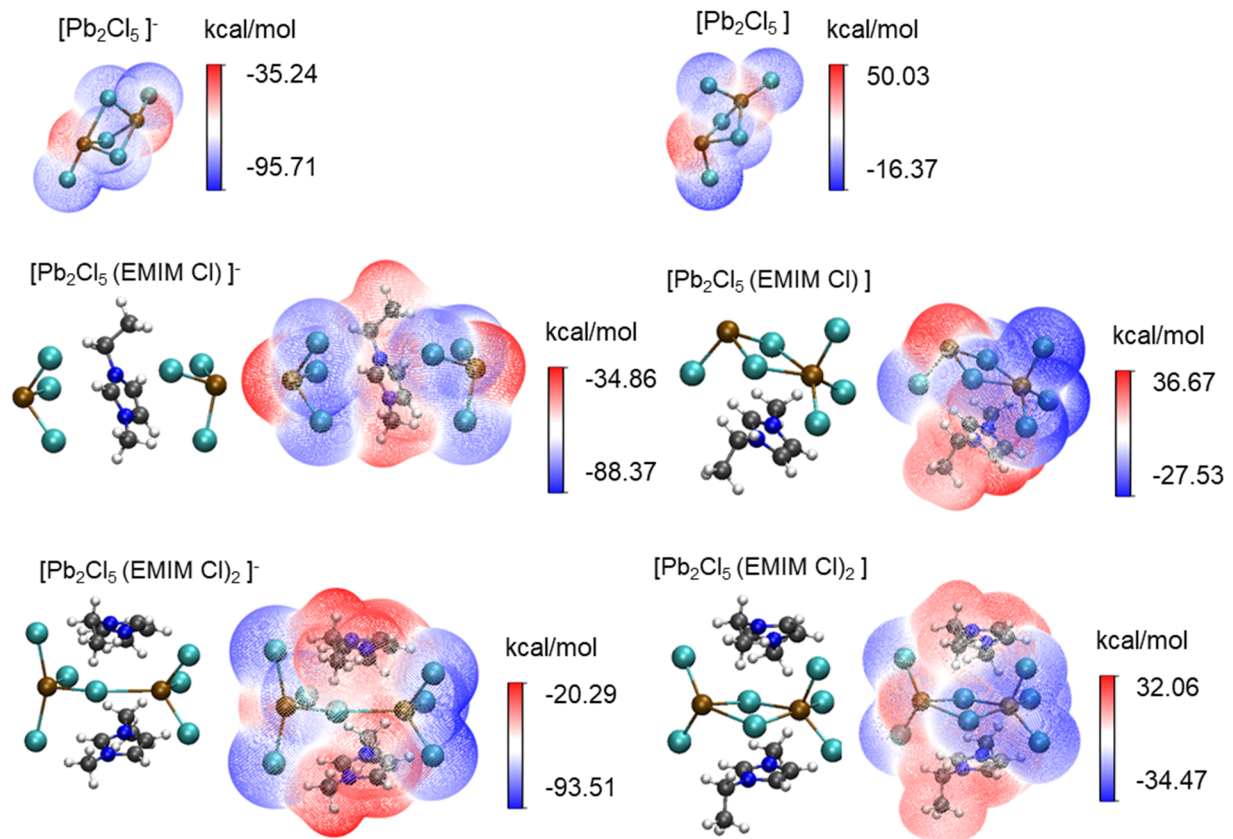

**Figure S8.** Visualization of the calculated ESP for gas phase  $\text{Pb}_2\text{Cl}_5^-$  clusters with EMIMCl.

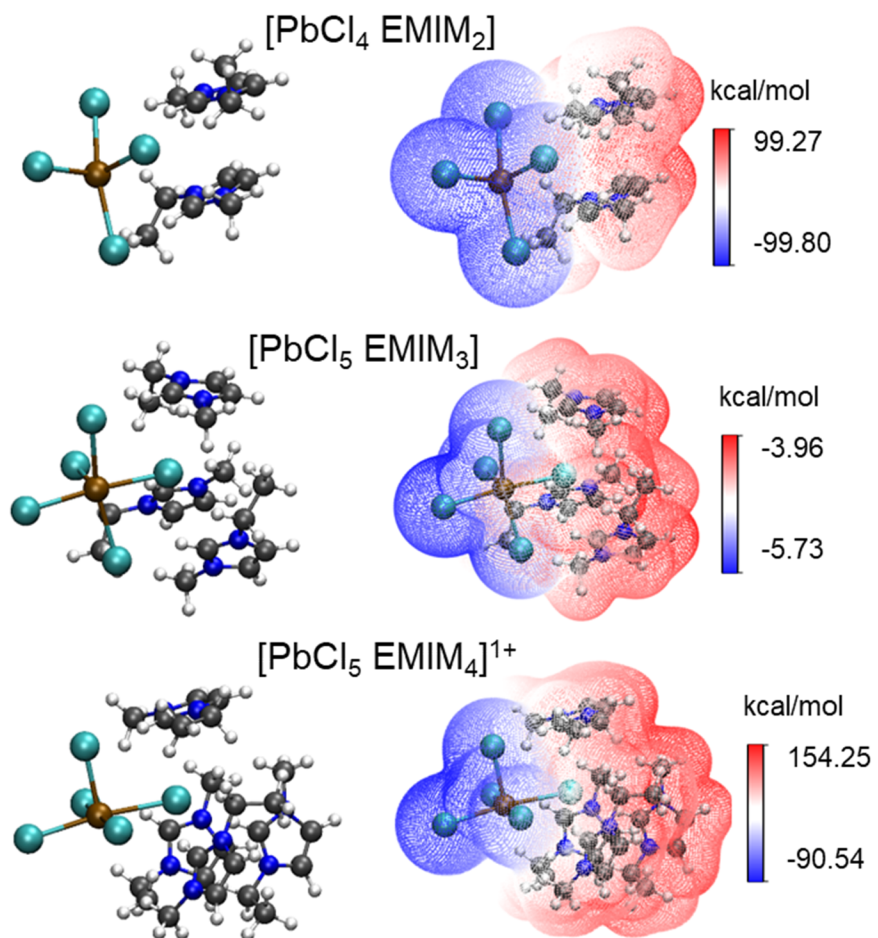

**Figure S9.** Visualization of the calculated ESP for aqueous phase PbCl<sub>4-5</sub> clusters with EMIM<sup>+</sup> cations identified by experimental NMR shifts.

**Table S1.** Experimentally measured ADE and VDE values (in eV) of the doubly charged  $[\text{PbCl}_3]_n[\text{EMIMCl}]_x^{n-}$  and  $[\text{Pb}_2\text{Cl}_5]_n[\text{EMIMCl}]_x^{n-}$  complexes.

| $n, x$                                                               | ADE                | VDE   |
|----------------------------------------------------------------------|--------------------|-------|
|                                                                      | expt. <sup>a</sup> | expt. |
| <b><math>[\text{PbCl}_3]_n[\text{EMIMCl}]_x^{n-}</math></b>          |                    |       |
| 2, 6                                                                 | 4.9                | 5.4   |
| 2, 7                                                                 | 4.9                | 5.4   |
| 2, 8                                                                 | 4.9                | 5.5   |
| 2, 9                                                                 | 4.9                | 5.5   |
| <b><math>[\text{Pb}_2\text{Cl}_5]_n[\text{EMIMCl}]_x^{n-}</math></b> |                    |       |
| 2, 3                                                                 | 4.8                | 5.5   |
| 2, 4                                                                 | 4.9                | 5.4   |

<sup>a</sup>The experimental ADE represents an estimate of its upper limit.

**Table S2.** NMR  $^1\text{H}$   $T_1$  and  $T_2$  values of the two solutions containing EMIMCl and the difference in  $T_1$  and  $T_2$  values.

|    | KCl + EMIMCl           |                        | PbCl <sub>2</sub> + KCl + EMIMCl |                        | Difference |           |
|----|------------------------|------------------------|----------------------------------|------------------------|------------|-----------|
|    | $^1\text{H}$ $T_1$ (s) | $^1\text{H}$ $T_2$ (s) | $^1\text{H}$ $T_1$ (s)           | $^1\text{H}$ $T_2$ (s) | $T_1$ (%)  | $T_2$ (%) |
| H1 | 8.2                    | 0.27                   | 8.6                              | 0.31                   | 5          | 15        |
| H2 | 11.4                   | 0.59                   | 11.1                             | 0.33                   | -3         | -44       |
| H3 | 10.9                   | 0.85                   | 10.6                             | 0.78                   | -3         | -8        |
| H4 | 5.5                    | 0.72                   | 5.2                              | 0.71                   | -5         | -1        |
| H5 | 4.9                    | 2.51                   | 4.7                              | 2.52                   | -4         | 0         |
| H6 | 5.5                    | 1.43                   | 5.2                              | 1.39                   | -5         | -3        |

**Table S3.** Diffusion coefficients of H<sub>2</sub>O and EMIM<sup>+</sup> and their ratios measured using pulsed field gradient (PFG)-NMR.

| D ( $\times 10^{-10}$ m <sup>2</sup> /s)  | KCl + EMIMCl | PbCl <sub>2</sub> + KCl + EMIMCl |
|-------------------------------------------|--------------|----------------------------------|
| D(H <sub>2</sub> O)                       | 18.91        | 18.86                            |
| D(EMIM <sup>+</sup> )                     | 9.19         | 9.00                             |
| D(H <sub>2</sub> O)/D(EMIM <sup>+</sup> ) | 2.06         | 2.09                             |

**Table S4.** Calculated HOMO and LUMO energies and HOMO-LUMO gaps of gas-phase  $\text{PbCl}_3^-$  and  $\text{Pb}_2\text{Cl}_5^-$  clusters and their complexes with EMIMCl as a function of EMIMCl molecules.

| Clusters                                      | LUMO (eV) | HOMO (eV) | HOMO-LUMO Gap (eV) |
|-----------------------------------------------|-----------|-----------|--------------------|
| $\text{PbCl}_3^-$                             | 1.8       | -2.3      | 4.1                |
| $[\text{PbCl}_3 + \text{EMIMCl}]^-$           | 1.0       | -1.7      | 2.6                |
| $[\text{PbCl}_3 + 2\text{EMIMCl}]^-$          | 0.8       | -2.4      | 3.3                |
| $[\text{PbCl}_3 + 3\text{EMIMCl}]^-$          | 0.6       | -2.8      | 3.3                |
| $[\text{PbCl}_3 + 4\text{EMIMCl}]^-$          | 0.5       | -2.9      | 3.5                |
| $\text{Pb}_2\text{Cl}_5^-$                    | 0.8       | -3.3      | 4.0                |
| $[\text{Pb}_2\text{Cl}_5 + \text{EMIMCl}]^-$  | 0.9       | -3.4      | 4.3                |
| $[\text{Pb}_2\text{Cl}_5 + 2\text{EMIMCl}]^-$ | 0.4       | -2.9      | 3.3                |

**Table S5.** Calculated HOMO and LUMO energies and HOMO-LUMO gaps of solution-phase  $\text{PbCl}_2$ ,  $\text{PbCl}_3^-$ ,  $\text{PbCl}_4^{2-}$  and  $\text{PbCl}_5^{3-}$  clusters and their complexes with EMIMCl as a function of EMIMCl molecules.

| Clusters                                | LUMO (eV) | HOMO (eV) | HOMO-LUMO Gap (eV) |
|-----------------------------------------|-----------|-----------|--------------------|
| $\text{PbCl}_2$                         | -2.7      | -6.7      | 4.0                |
| $[\text{PbCl}_2 + 1\text{EMIMCl}]$      | -2.7      | -6.7      | 4.0                |
| $[\text{PbCl}_2 + 2\text{EMIMCl}]$      | -2.6      | -6.5      | 3.9                |
| $[\text{PbCl}_2 + 3\text{EMIMCl}]$      | -2.7      | -6.6      | 3.9                |
| $[\text{PbCl}_2 + 4\text{EMIMCl}]$      | -2.7      | -6.5      | 3.8                |
| $\text{PbCl}_3^-$                       | -1.1      | -6.0      | 4.9                |
| $[\text{PbCl}_3 + 1\text{EMIMCl}]^-$    | -1.7      | -6.1      | 4.3                |
| $[\text{PbCl}_3 + 2\text{EMIMCl}]^-$    | -1.5      | -6.1      | 4.5                |
| $[\text{PbCl}_3 + 3\text{EMIMCl}]^-$    | -1.7      | -6.3      | 4.5                |
| $[\text{PbCl}_3 + 4\text{EMIMCl}]^-$    | -1.8      | -6.4      | 4.5                |
| $\text{PbCl}_4^{2-}$                    | -0.9      | -5.1      | 4.2                |
| $[\text{PbCl}_4 + 1\text{EMIMCl}]^{2-}$ | -1.4      | -5.3      | 3.9                |
| $[\text{PbCl}_4 + 2\text{EMIMCl}]^{2-}$ | -1.8      | -5.4      | 3.7                |
| $[\text{PbCl}_4 + 3\text{EMIMCl}]^{2-}$ | -1.6      | -5.5      | 3.9                |
| $[\text{PbCl}_4 + 4\text{EMIMCl}]^{2-}$ | -1.6      | -5.6      | 3.9                |
| $\text{PbCl}_5^{3-}$                    | -0.8      | -4.8      | 4.1                |
| $[\text{PbCl}_5 + 1\text{EMIMCl}]^{3-}$ | -1.2      | -4.9      | 3.8                |
| $[\text{PbCl}_5 + 2\text{EMIMCl}]^{3-}$ | -1.4      | -5.0      | 3.6                |
| $[\text{PbCl}_5 + 3\text{EMIMCl}]^{3-}$ | -1.5      | -5.1      | 3.6                |
| $[\text{PbCl}_5 + 4\text{EMIMCl}]^{3-}$ | -1.5      | -5.3      | 3.7                |
